# Supplementary material
Source: publisher figshare collection journal article supplement (https://acs.figshare.com/ndownloader/files/10735477)
Supplement: Supplementary file 1 [file 10735477]

# ***Supporting Information***

## **Pd-catalyzed substitution of the OH group of non-derivatized allylic alcohols by phenols**

Thanya Rukkijakan, Sunisa Akkarasamiyo, Supaporn Sawadjoon, and Joseph S. M. Samec\*

*Address: Department of Organic Chemistry, Stockholm University, 106 91, Stockholm,  
(Sweden)*

*E-mail: joseph.samec@su.se*

# Checklist of characterization data of all compounds

| Compounds                                                                                 | Known/<br>New compound | <sup>1</sup> H-NMR | <sup>13</sup> C-NMR | IR | HRMS |
|-------------------------------------------------------------------------------------------|------------------------|--------------------|---------------------|----|------|
| 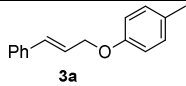<br>3a   | Known                  | √                  | √                   | √  | √    |
| <br>3b   | Known                  | √                  | √                   | √  | √    |
| <br>3c   | Known                  | √                  | √                   | √  | √    |
| <br>3d   | Known                  | √                  | √                   | √  | √    |
| <br>3e   | Known                  | √                  | √                   | √  | √    |
| <br>3f   | Known                  | √                  | √                   | √  | √    |
| <br>3g   | Known                  | √                  | √                   | √  | √    |
| <br>3h  | Known                  | √                  | √                   | √  | √    |
| <br>3i | Known                  | √                  | √                   | √  | √    |
| <br>3j | Known                  | √                  | √                   | √  | √    |
| <br>3k | Known                  | √                  | √                   | √  | √    |
| <br>3l | Known                  | √                  | √                   | √  | √    |
| <br>3m | New                    | √                  | √                   | √  | √    |
| <br>3n | Known                  | √                  | √                   | √  | √    |
| <br>3o | Known                  | √                  | √                   | √  | √    |

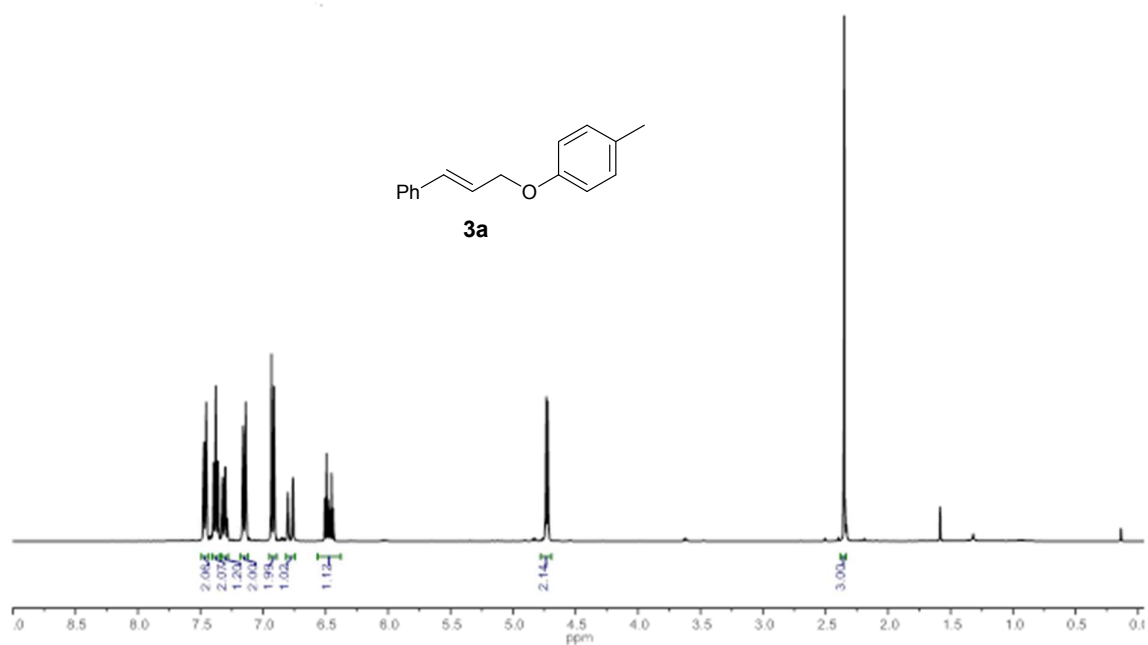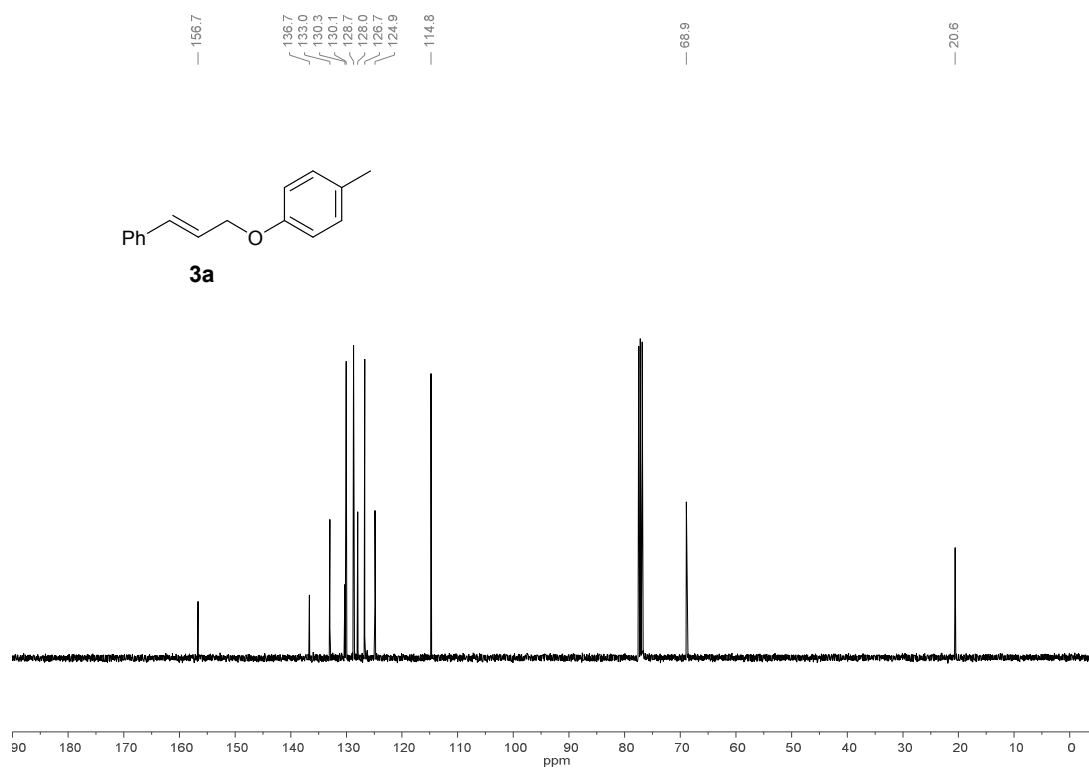

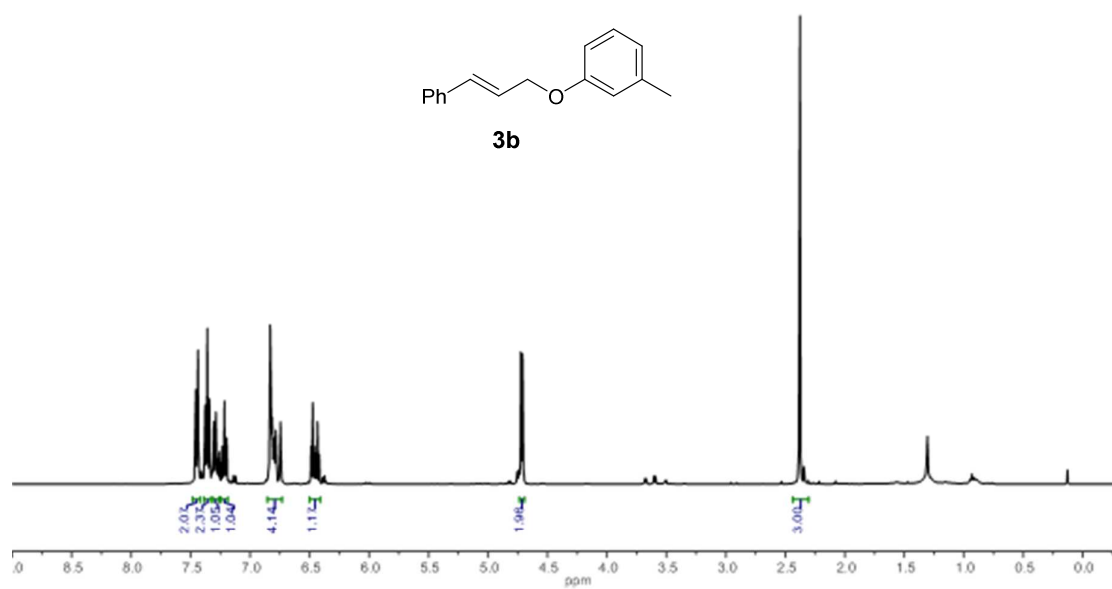

$^1\text{H}$  NMR (400 MHz,  $\text{CDCl}_3$ ) of compound **3b**

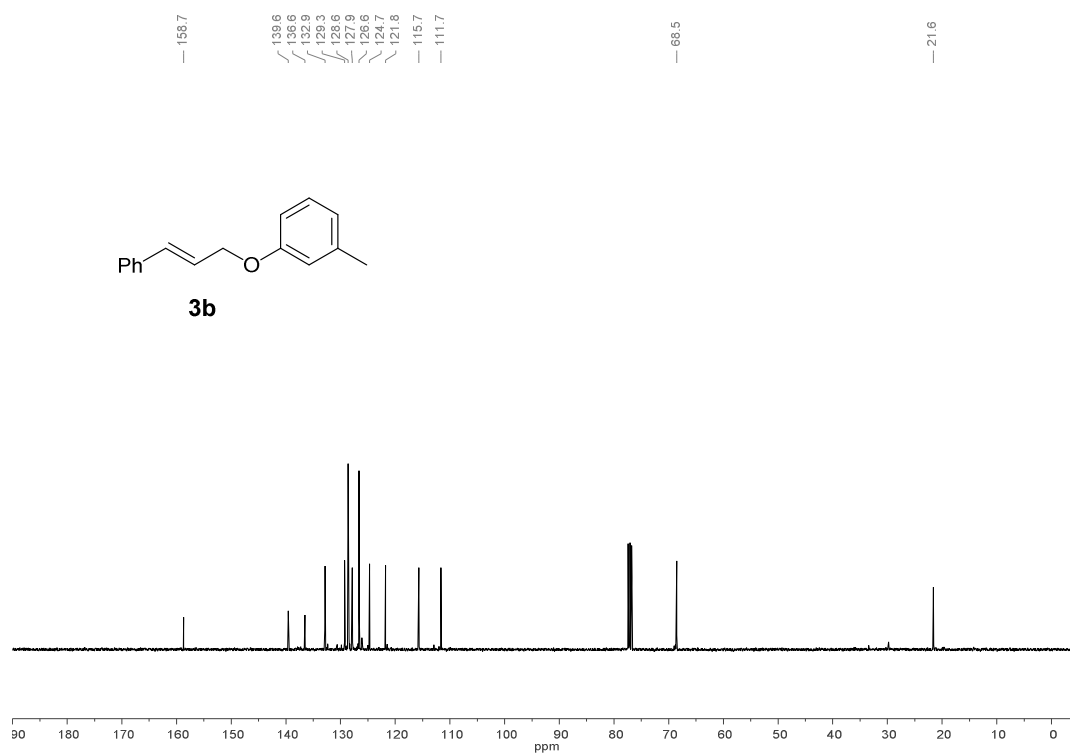

$^{13}\text{C}$  NMR (100 MHz,  $\text{CDCl}_3$ ) of compound **3b**

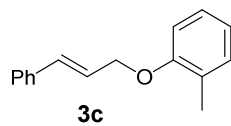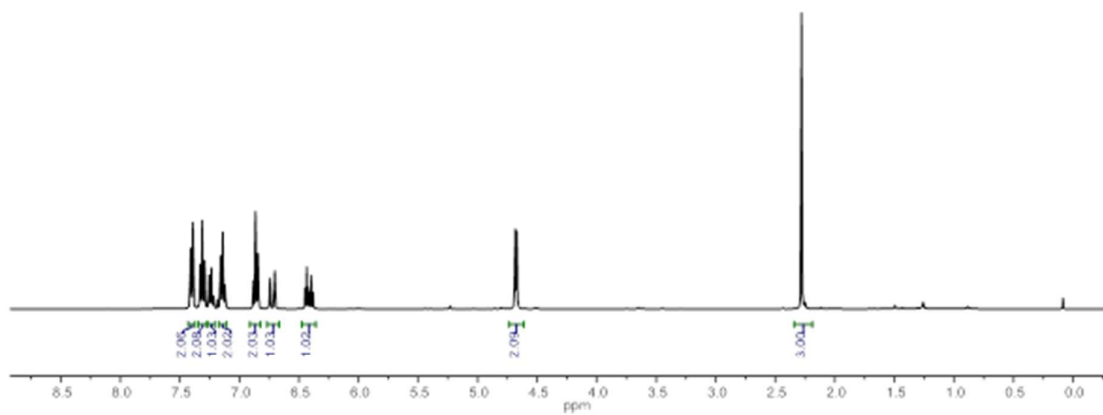

<sup>1</sup>H NMR (400 MHz, CDCl<sub>3</sub>) of compound **3c**

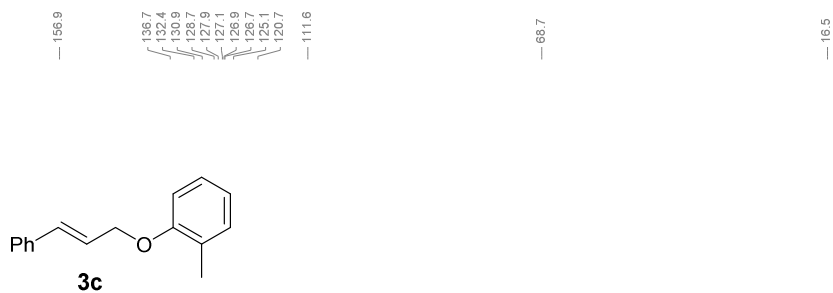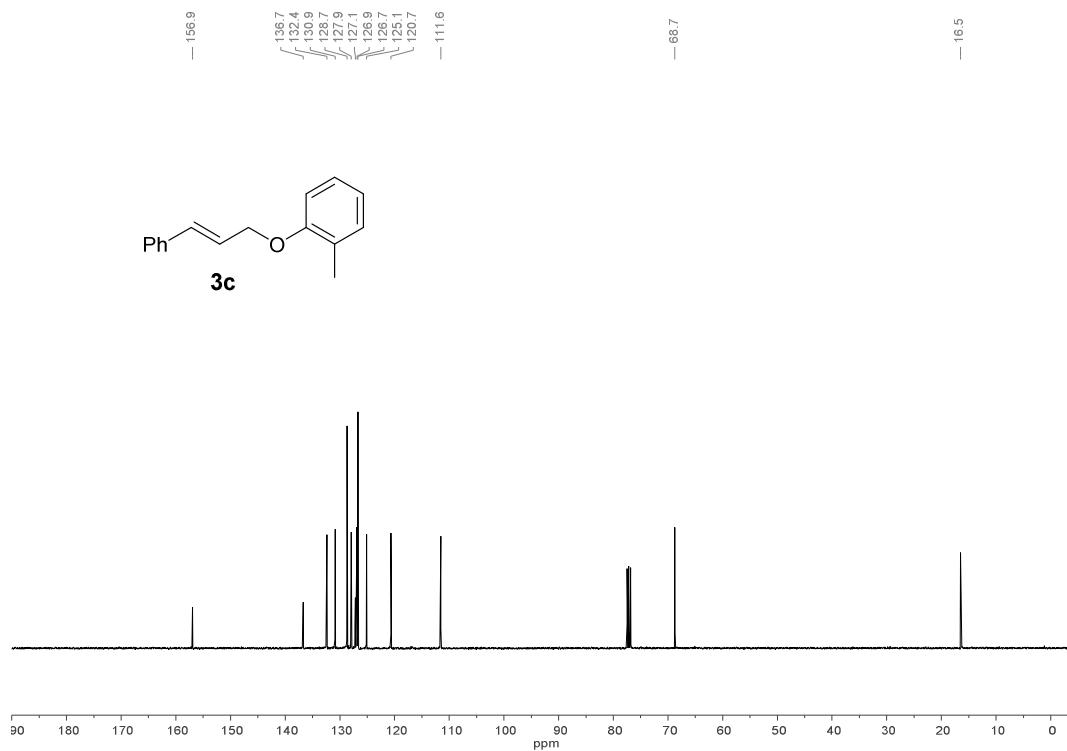

<sup>13</sup>C NMR (100 MHz, CDCl<sub>3</sub>) of compound **3c**

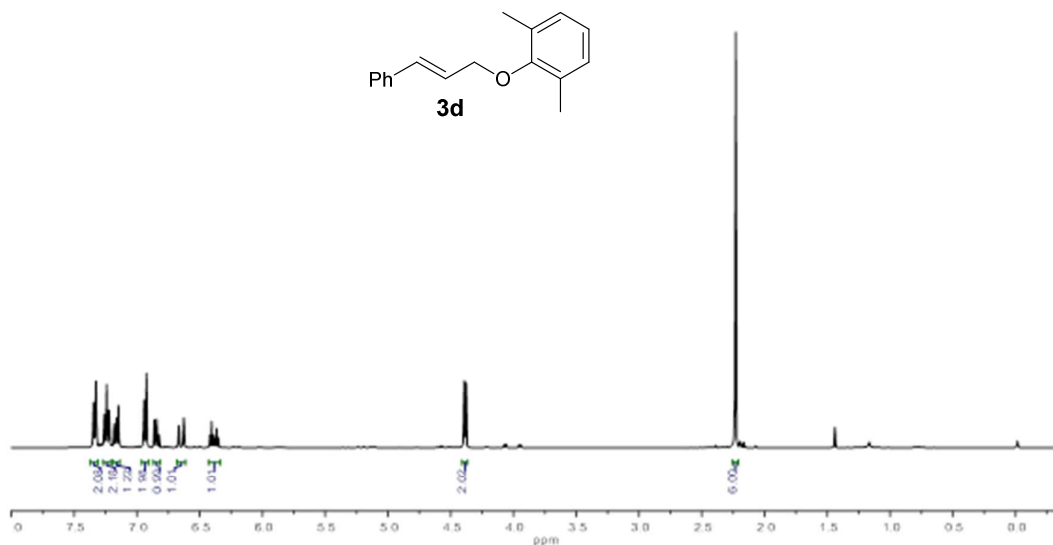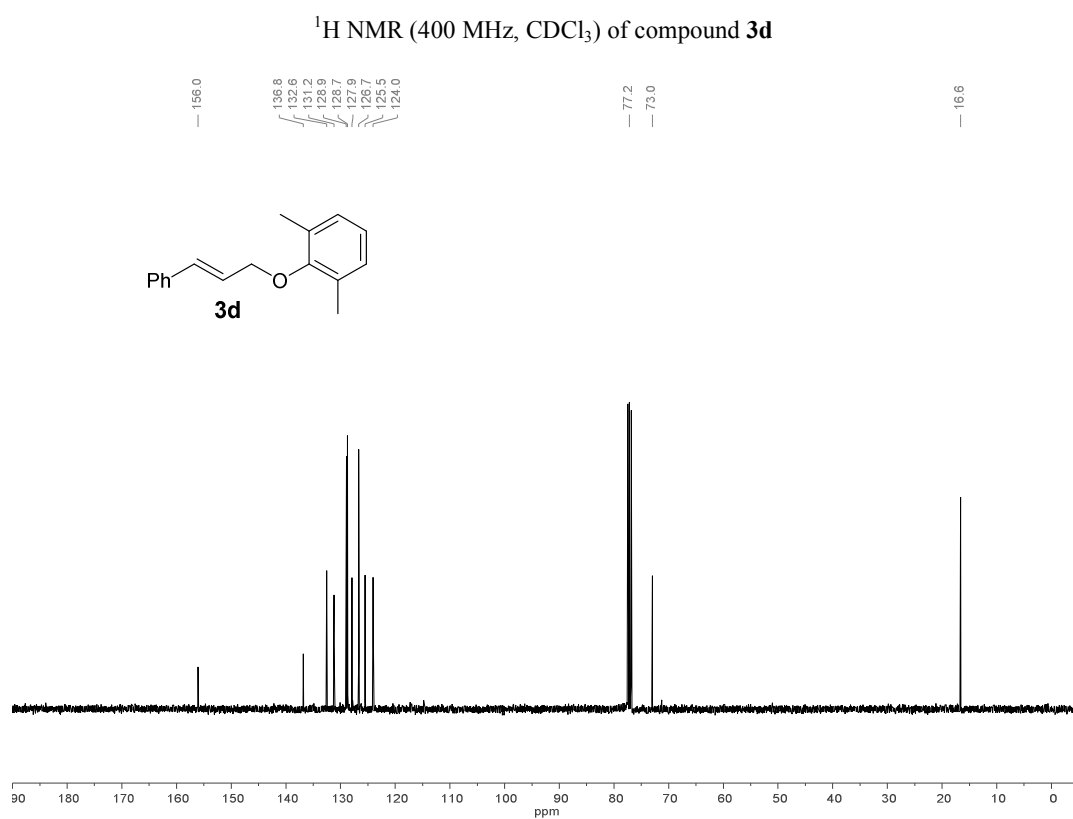

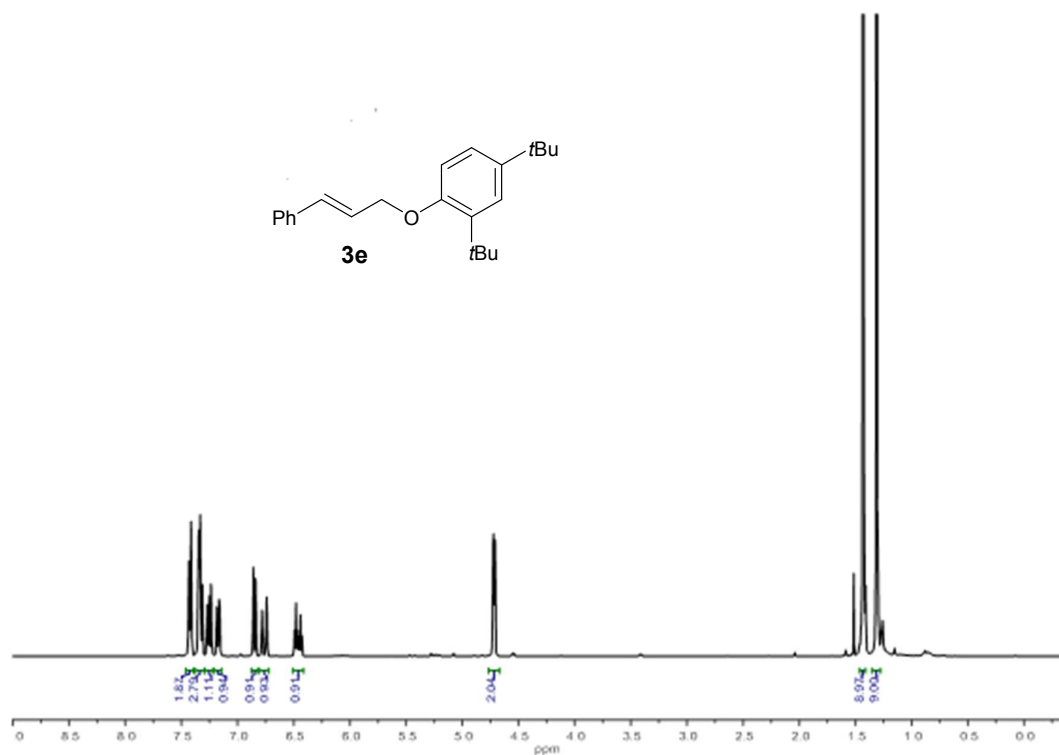

<sup>1</sup>H NMR (400 MHz, CDCl<sub>3</sub>) of compound **3e**

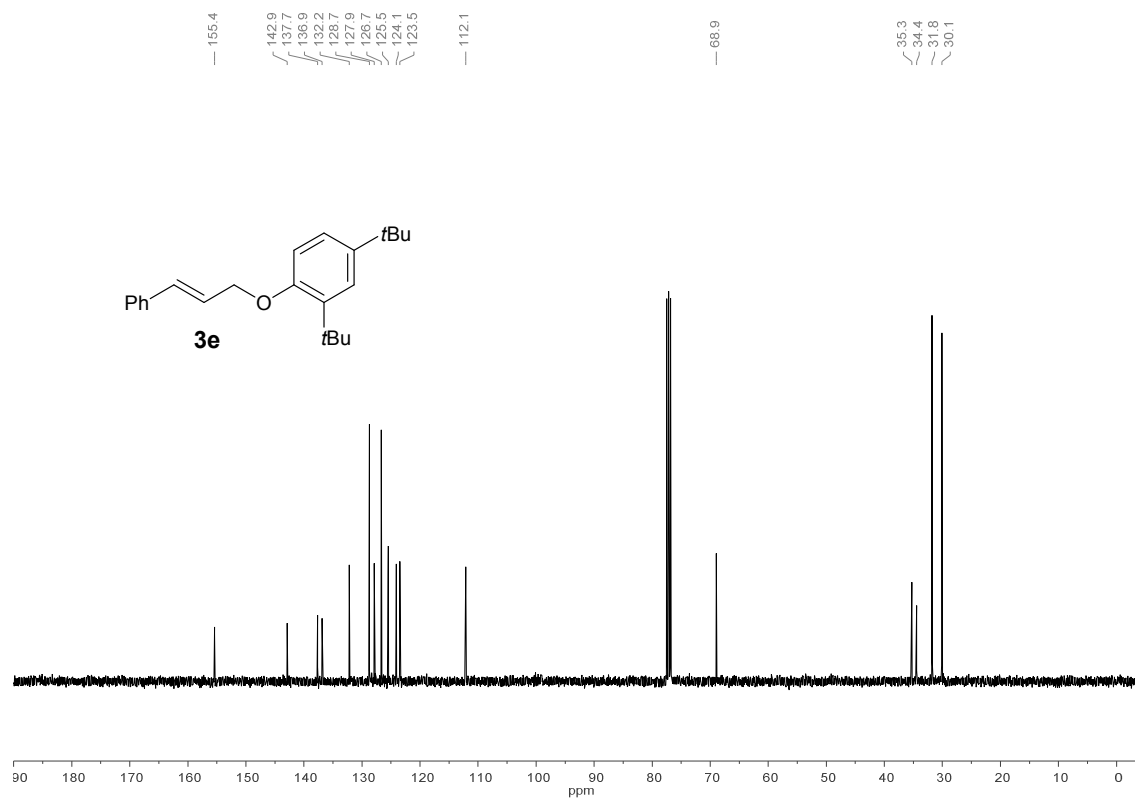

<sup>13</sup>C NMR (100 MHz, CDCl<sub>3</sub>) of compound **3e**

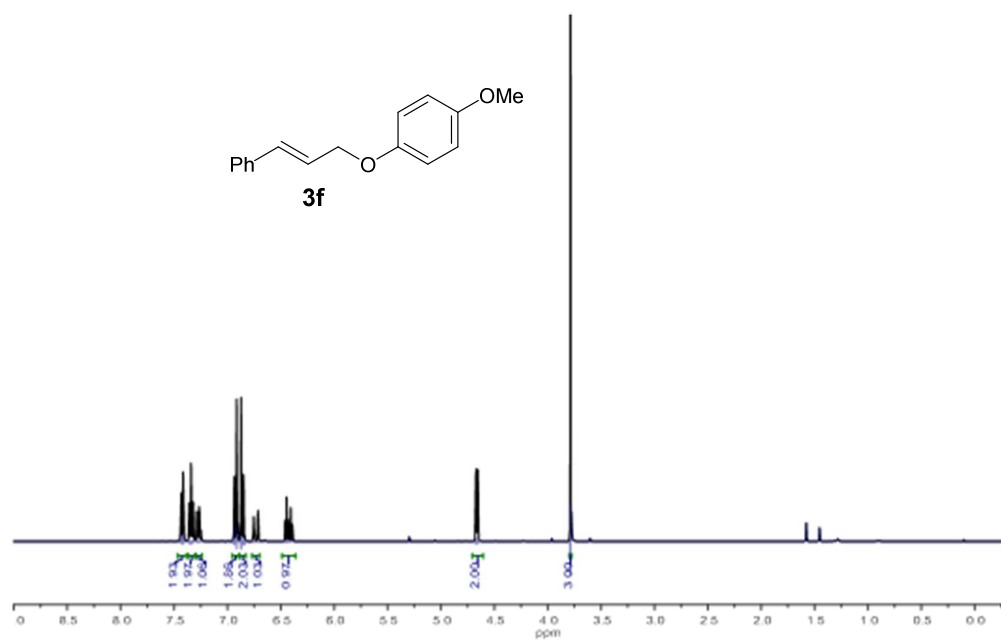

<sup>1</sup>H NMR (400 MHz, CDCl<sub>3</sub>) of compound **3f**

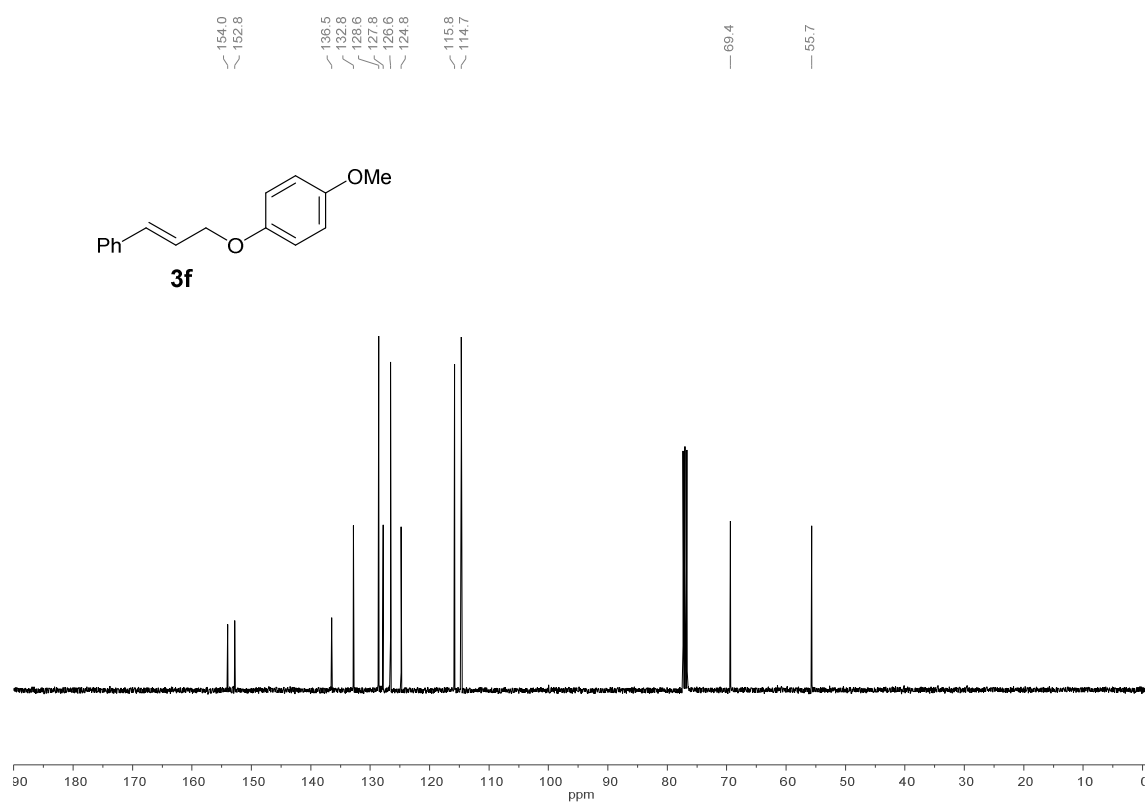

<sup>13</sup>C NMR (100 MHz, CDCl<sub>3</sub>) of compound **3f**



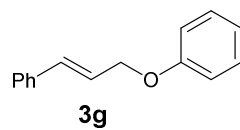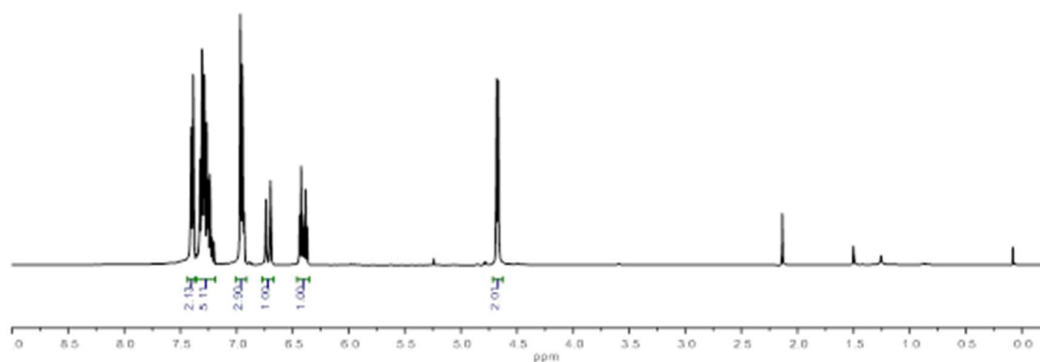

<sup>1</sup>H NMR (400 MHz, CDCl<sub>3</sub>) of compound **3g**

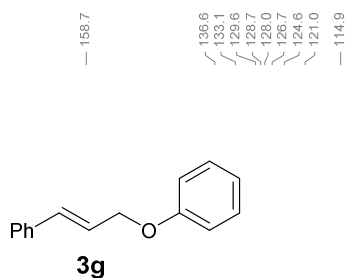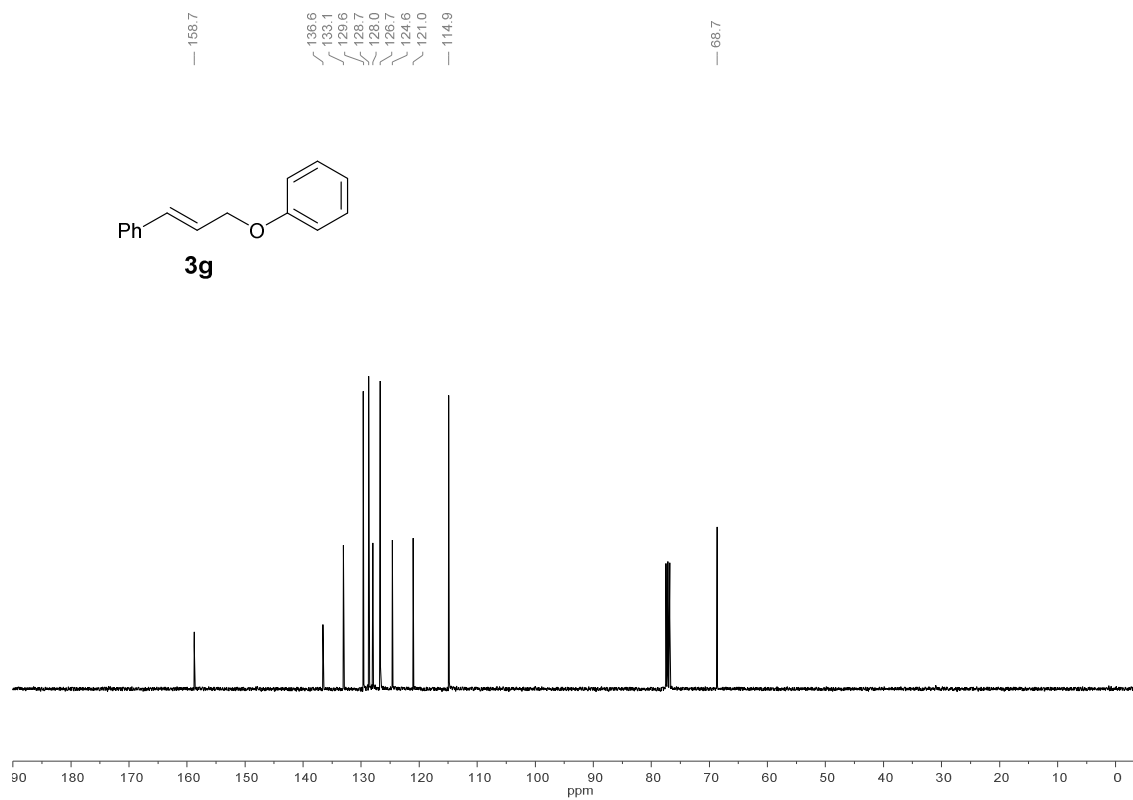

<sup>13</sup>C NMR (100 MHz, CDCl<sub>3</sub>) of compound **3g**

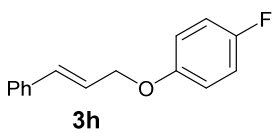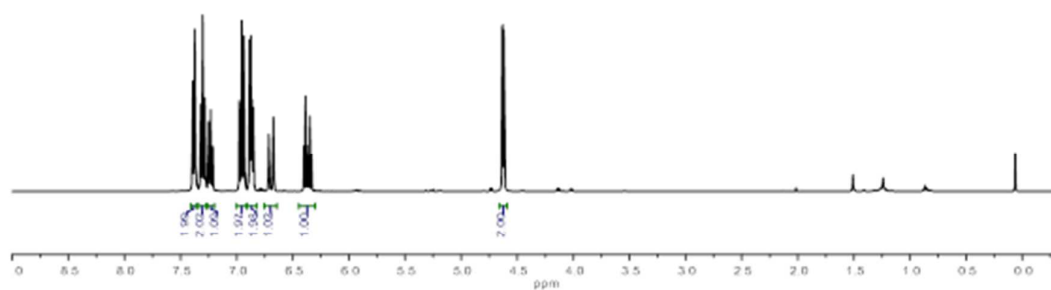

$^1\text{H}$  NMR (400 MHz,  $\text{CDCl}_3$ ) of compound **3h**

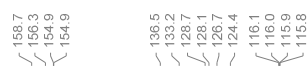

— 69.4

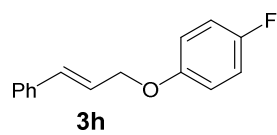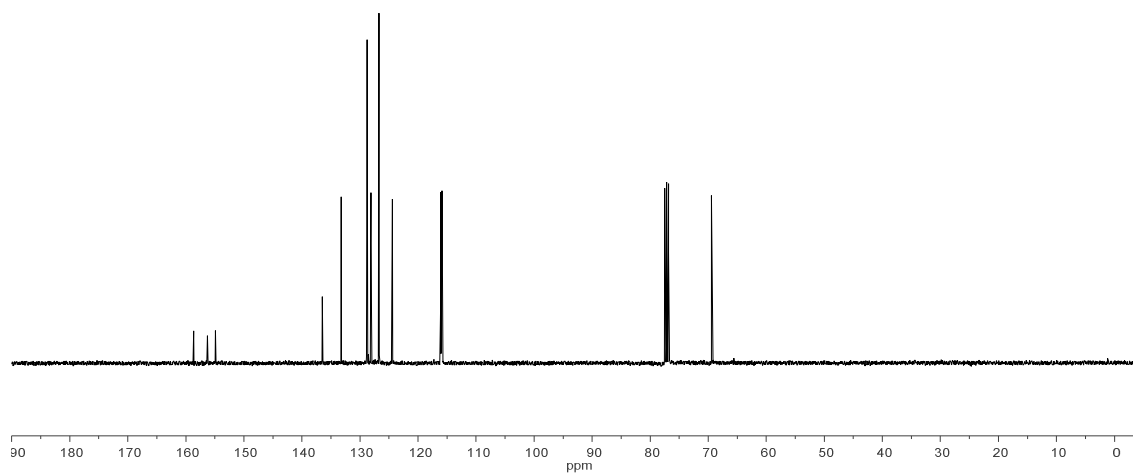

$^{13}\text{C}$  NMR (100 MHz,  $\text{CDCl}_3$ ) of compound **3h**

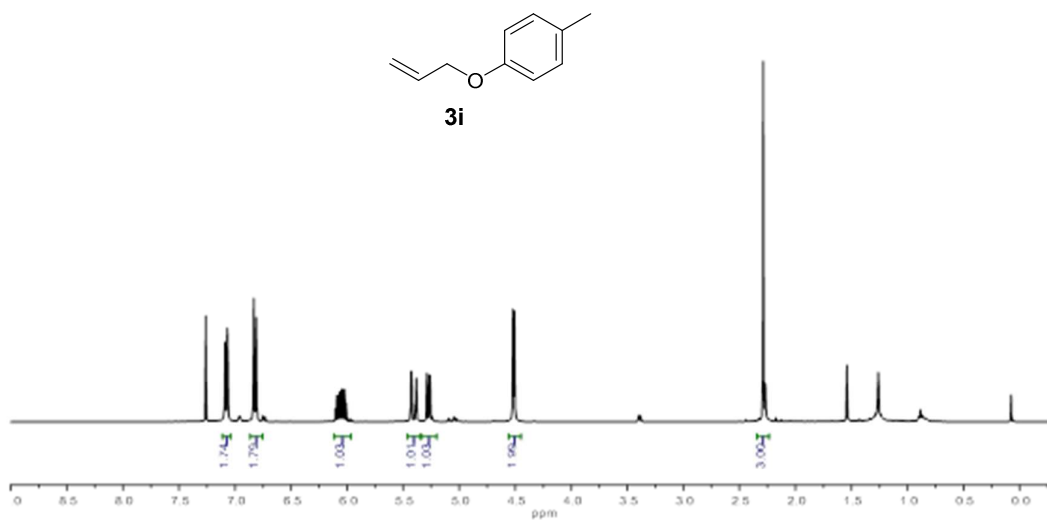

$^1\text{H}$  NMR (400 MHz,  $\text{CDCl}_3$ ) of compound **3i**

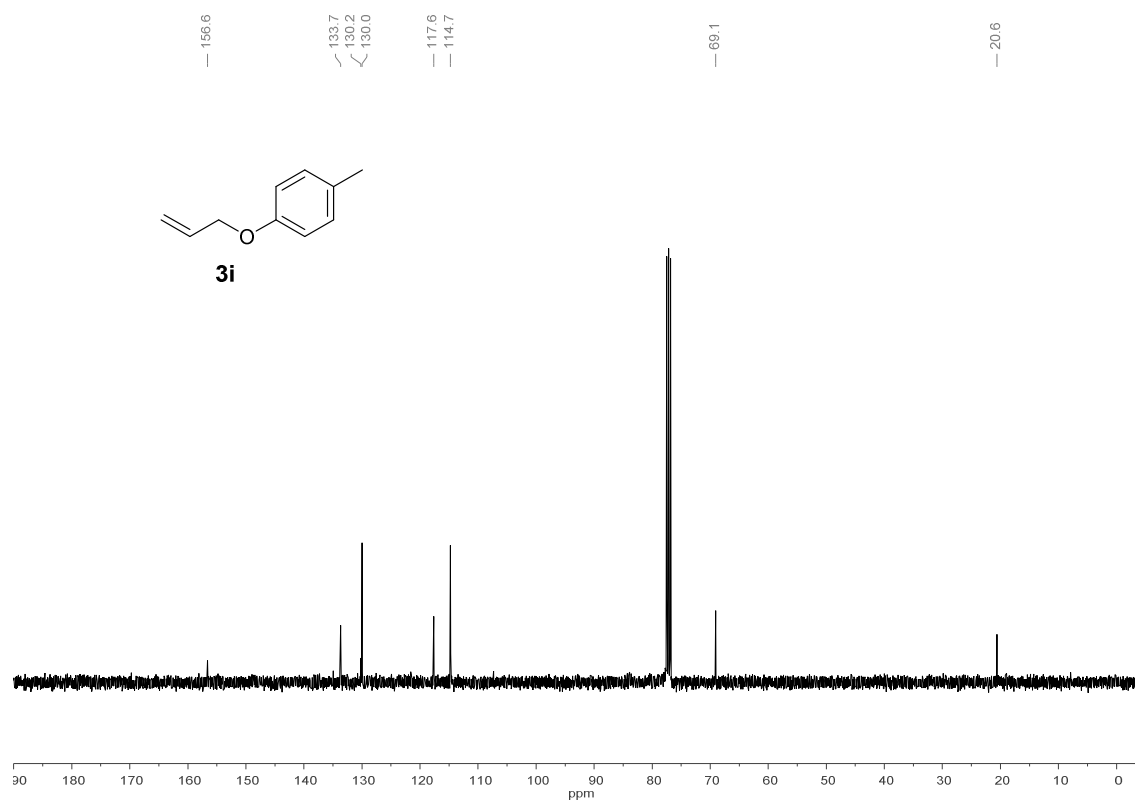

$^{13}\text{C}$  NMR (100 MHz,  $\text{CDCl}_3$ ) of compound **3i**

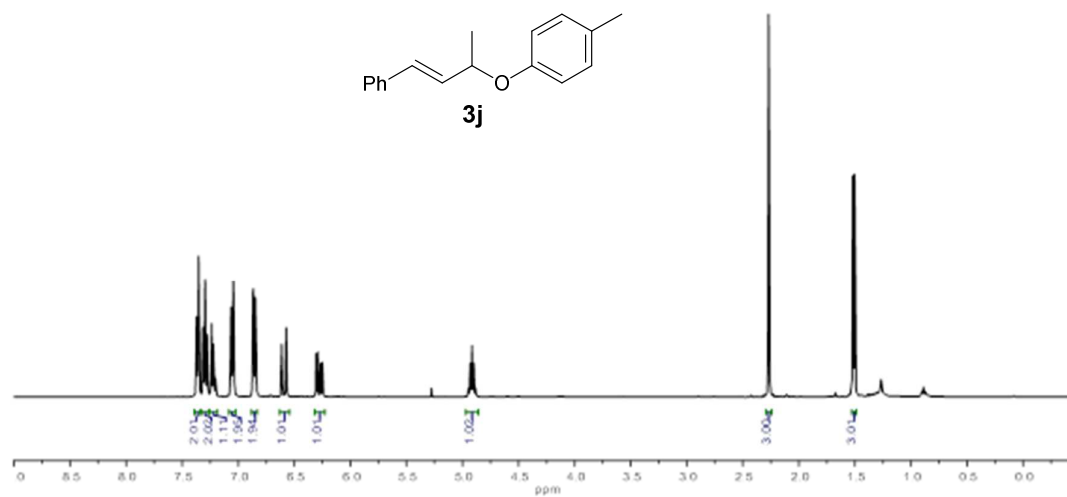

$^1\text{H}$  NMR (400 MHz,  $\text{CDCl}_3$ ) of compound **3j**

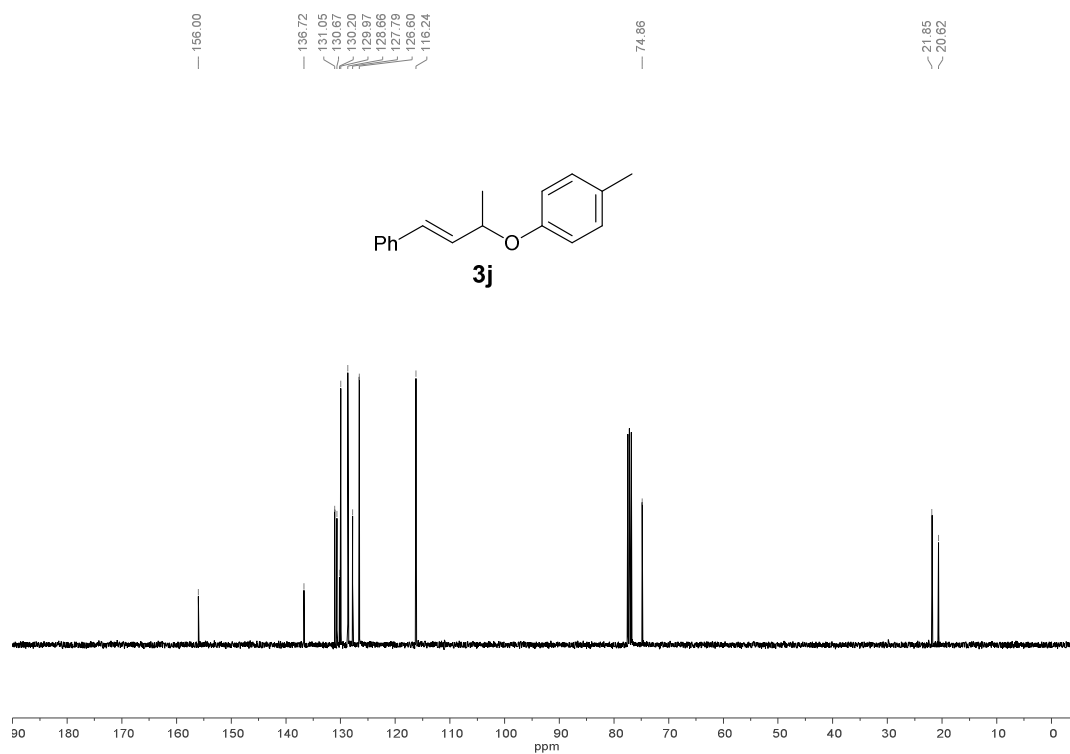

$^{13}\text{C}$  NMR (100 MHz,  $\text{CDCl}_3$ ) of compound **3j**

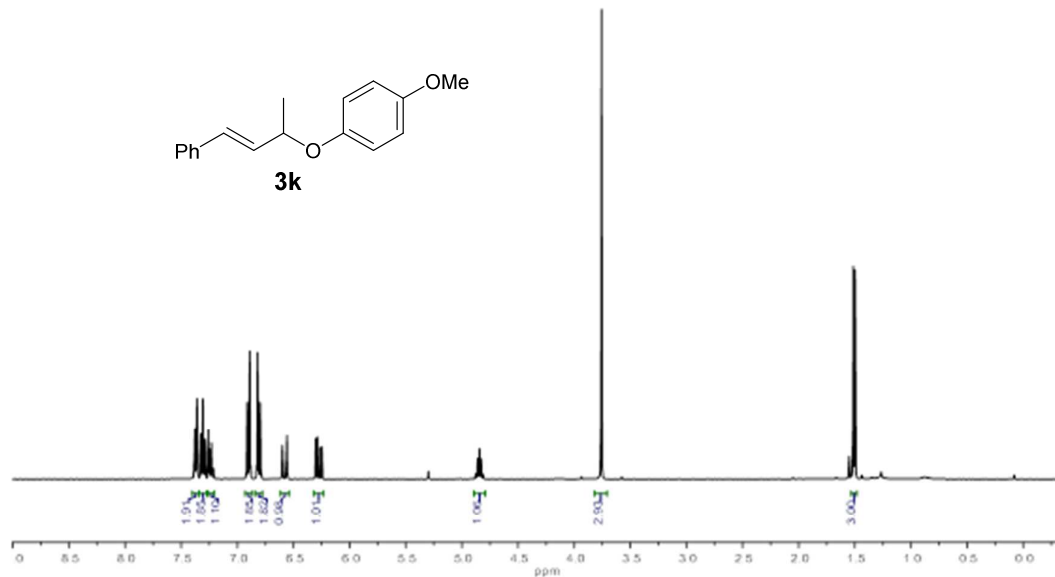

<sup>1</sup>H NMR (400 MHz, CDCl<sub>3</sub>) of compound **3k**

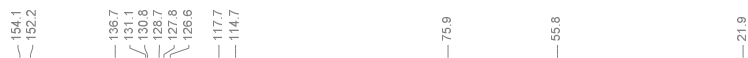

<sup>13</sup>C NMR (100 MHz, CDCl<sub>3</sub>) of compound **3k**

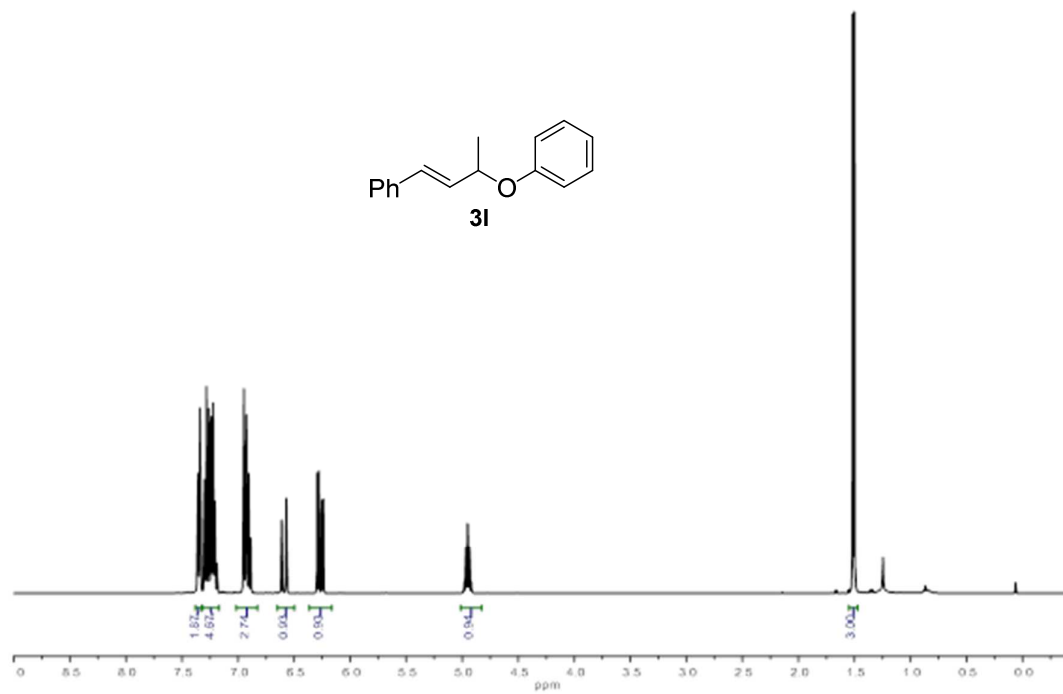

$^1\text{H}$  NMR (400 MHz,  $\text{CDCl}_3$ ) of compound **3I**

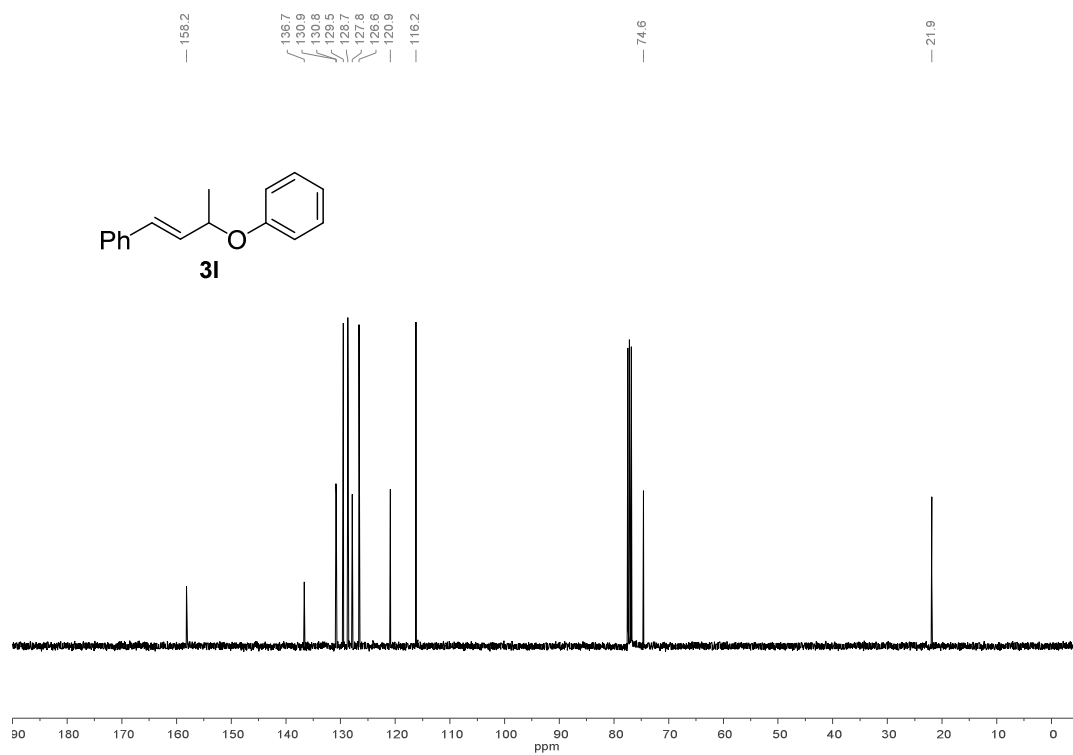

$^{13}\text{C}$  NMR (100 MHz,  $\text{CDCl}_3$ ) of compound **3I**

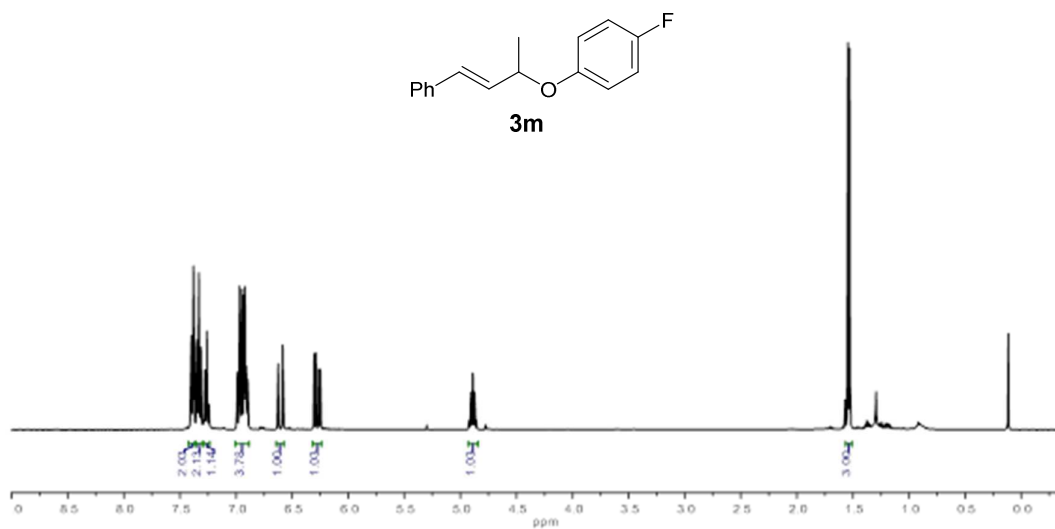

$^1\text{H}$  NMR (400 MHz,  $\text{CDCl}_3$ ) of compound **3m**

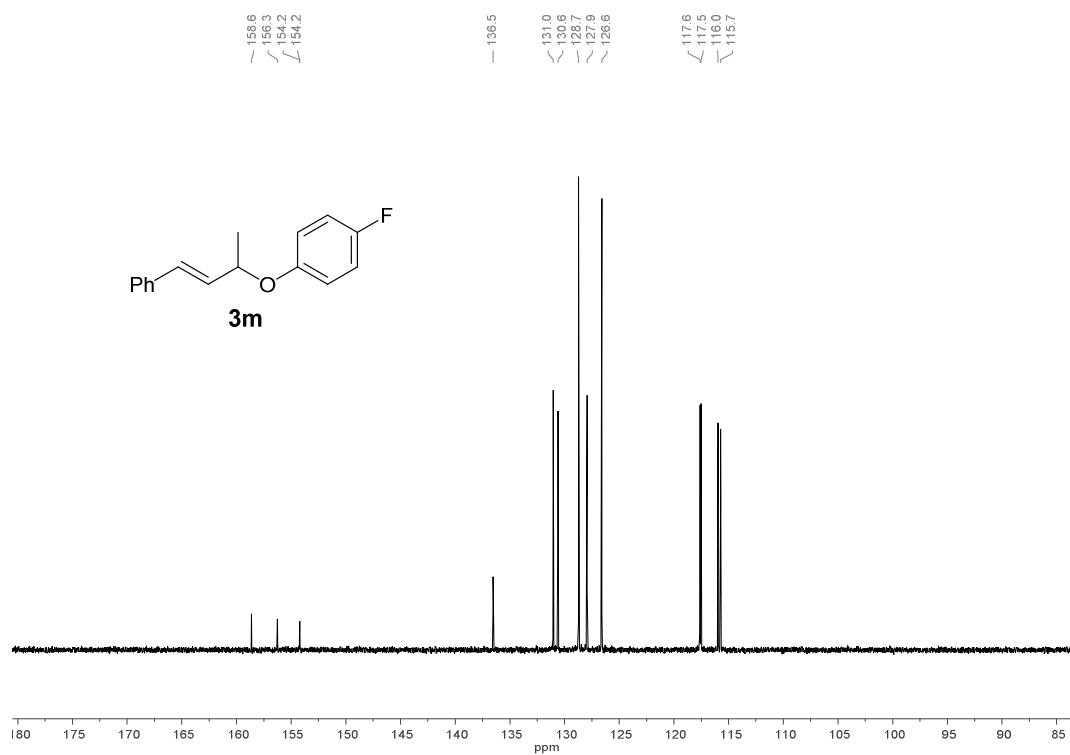

$^{13}\text{C}$  NMR (100 MHz,  $\text{CDCl}_3$ ) of compound **3m**

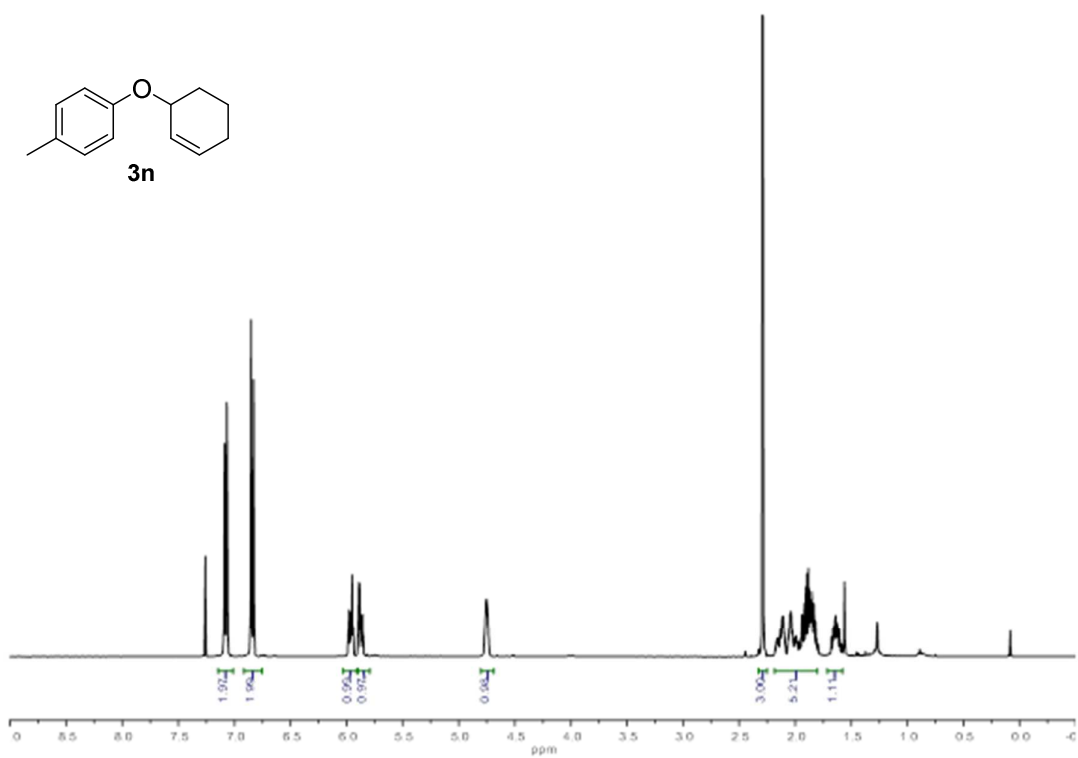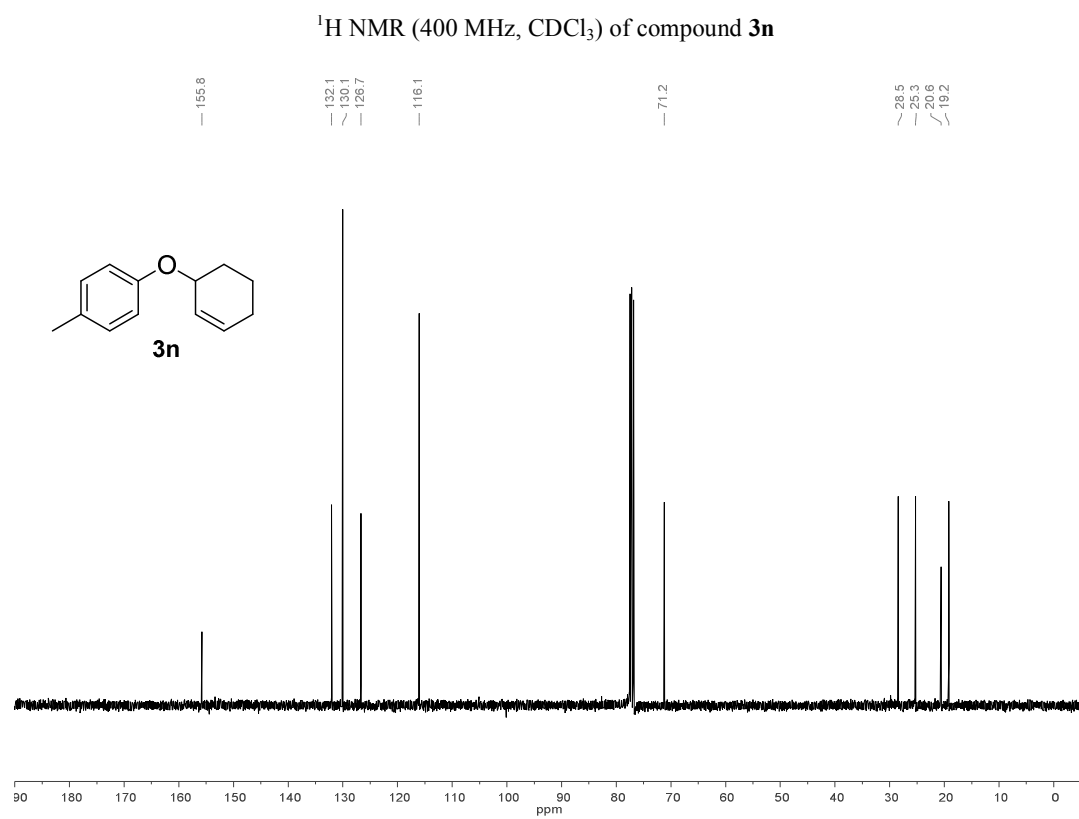



SA-1034TR

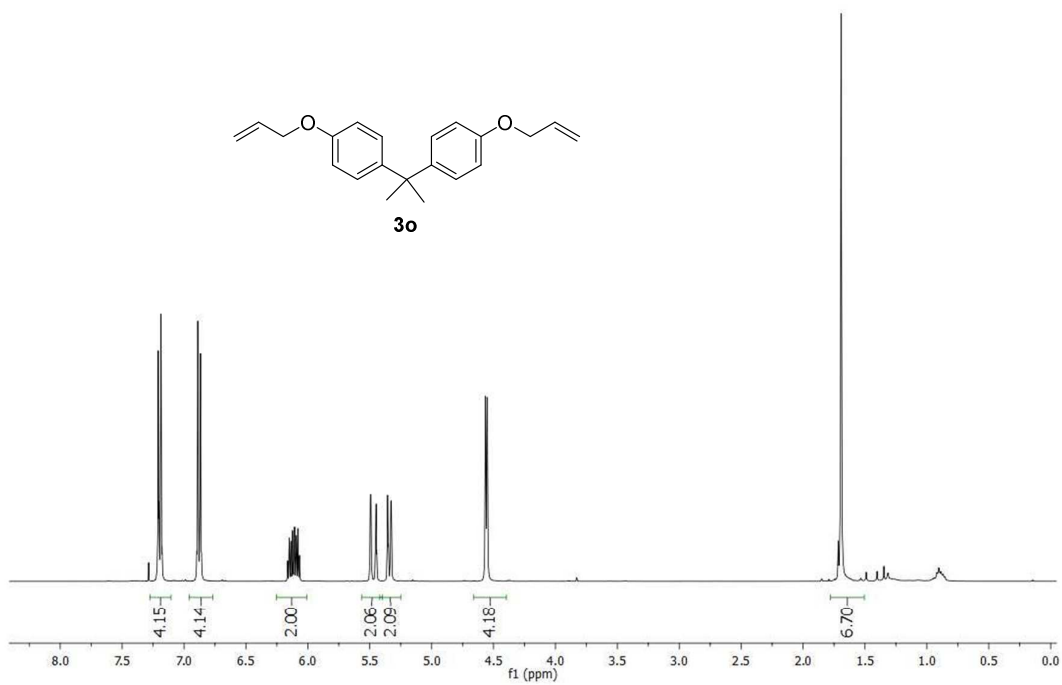

<sup>1</sup>H NMR (400 MHz, CDCl<sub>3</sub>) of compound **3o**

SA-1034TR

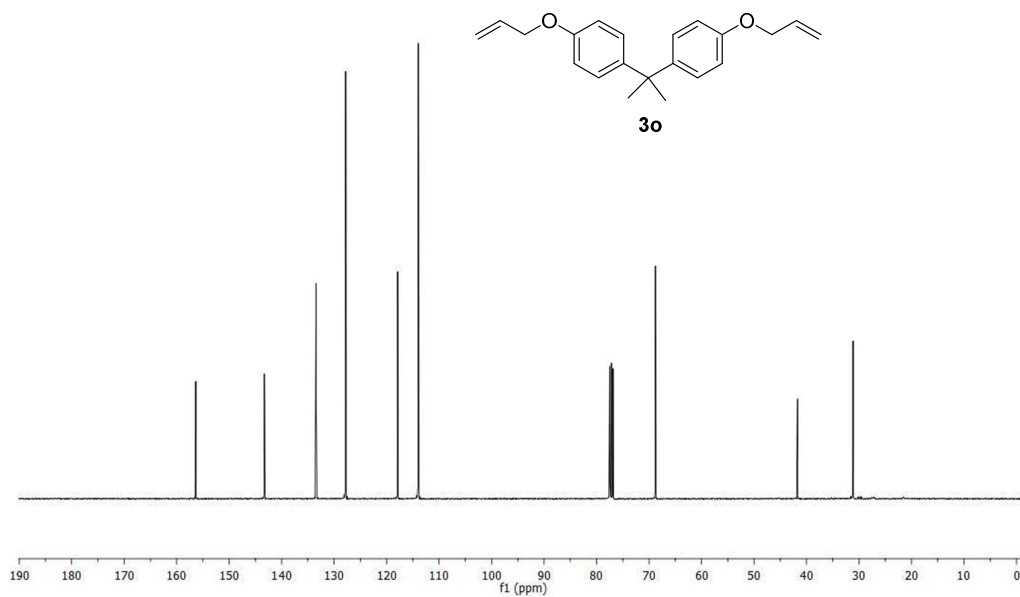

<sup>13</sup>C NMR (100 MHz, CDCl<sub>3</sub>) of compound **3o**
